# Supplementary material
Source: HighWire-hosted journal article supplement (https://bmjopen.bmj.com/content/11/2/e044329)
Supplement: inline-supplementary-material-1 [file inline-supplementary-material-1.pdf]

SUPPLEMENTARY MATERIAL

Table of contents

Supplementary Appendix (A-E) .....2

Supplementary figure legends (1-4) .....12

Supplementary Table 1 .....17

## **Supplemental Appendix A: List of participating centers and investigators**

### **The CREDO-Kyoto PCI/CABG Registry Cohort-2**

#### **Cardiology**

Kyoto University Hospital: Takeshi Kimura, Hiroki Shiomi

Kishiwada City Hospital: Mitsuo Matsuda, Hirokazu Mitsuoka

Tenri Hospital: Yoshihisa Nakagawa

Hyogo Prefectural Amagasaki Hospital: Hisayoshi Fujiwara, Yoshiki Takatsu, Ryoji

Taniguchi

Kitano Hospital: Ryuji Nohara

Koto Memorial Hospital: Tomoyuki Murakami, Teruki Takeda

Kokura Memorial Hospital: Masakiyo Nobuyoshi, Masashi Iwabuchi

Maizuru Kyosai Hospital: Ryoza Tatami

Nara Hospital, Kinki University Faculty of Medicine: Manabu Shirotani

Kobe City Medical Center General Hospital: Toru Kita, Yutaka Furukawa, Natsuhiko Ehara

Nishi-Kobe Medical Center: Hiroshi Kato, Hiroshi Eizawa

Kansai Denryoku Hospital: Katsuhisa Ishii

Osaka Red Cross Hospital: Masaru Tanaka

University of Fukui Hospital: Jong-Dae Lee, Akira Nakano

Shizuoka City Shizuoka Hospital: Akinori Takizawa

Hamamatsu Rosai Hospital: Masaaki Takahashi

Shiga University of Medical Science Hospital: Minoru Horie, Hiroyuki Takashima

Japanese Red Cross Wakayama Medical Center: Takashi Tamura

Shimabara Hospital: Mamoru Takahashi

Kagoshima University Medical and Dental Hospital: Chuwa Tei, Shuichi Hamasaki

Shizuoka General Hospital: Hirofumi Kambara, Osamu Doi, Satoshi Kaburagi

Kurashiki Central Hospital: Kazuaki Mitsudo, Kazushige Kadota

Mitsubishi Kyoto Hospital: Shinji Miki, Tetsu Mizoguchi

Kumamoto University Hospital: Hisao Ogawa, Seigo Sugiyama

Shimada Municipal Hospital: Ryuichi Hattori, Takeshi Aoyama, Makoto Araki

Juntendo University Shizuoka Hospital: Satoru Suwa

### **Cardiovascular Surgery**

Kyoto University Hospital: Ryuzo Sakata, Tadashi Ikeda, Akira Marui

Kishiwada City Hospital: Masahiko Onoe

Tenri Hospital: Kazuo Yamanaka

Hyogo Prefectural Amagasaki Hospital: Keiichi Fujiwara, Nobuhisa Ohno

Kokura Memorial Hospital: Michiya Hanyu

Maizuru Kyosai Hospital: Tsutomu Matsushita

Nara Hospital, Kinki University Faculty of Medicine: Noboru Nishiwaki, Yuichi Yoshida

Kobe City Medical Center General Hospital: Yukikatsu Okada, Michihiro Nasu

Osaka Red Cross Hospital: Shogo Nakayama

University of Fukui Hospital: Kuniyoshi Tanaka, Takaaki Koshiji, Koichi Morioka

Shizuoka City Shizuoka Hospital: Mitsuomi Shimamoto, Fumio Yamazaki

Hamamatsu Rosai Hospital: Junichiro Nishizawa

Japanese Red Cross Wakayama Medical Center: Masaki Aota

Shimabara Hospital: Takafumi Tabata

Kagoshima University Medical and Dental Hospital: Yutaka Imoto, Hiroyuki Yamamoto

Shizuoka General Hospital: Katsuhiko Matsuda, Masafumi Nara

Kurashiki Central Hospital: Tatsuhiko Komiya

Mitsubishi Kyoto Hospital: Hiroyuki Nakajima

Kumamoto University Hospital: Michio Kawasuji, Syuji Moriyama

Juntendo University Shizuoka Hospital: Keiichi Tanbara

**The CREDO-Kyoto PCI/CABG Registry Cohort-3****Cardiology**

Kyoto University Hospital: Takeshi Kimura, Hiroki Shiomi

Kishiwada City Hospital: Mitsuo Matsuda, Takashi Uegaito

Tenri Hospital: Toshihiro Tamura

Hyogo Prefectural Amagasaki General Medical Center: Yukihiro Sato, Ryoji Taniguchi

Kitano Hospital: Moriaki Inoko

Koto Memorial Hospital: Tomoyuki Murakami, Teruki Takeda

Kokura Memorial Hospital: Kenji Ando, Takenori Domei

Kindai University Nara Hospital: Manabu Shirotani

Kobe City Medical Center General Hospital: Yutaka Furukawa, Natsuhiko Ehara

Kobe City Nishi-Kobe Medical Center: Hiroshi Eizawa

Kansai Denryoku Hospital: Katsuhisa Ishii, Eiji Tada

Osaka Red Cross Hospital: Masaru Tanaka, Tsukasa Inada

Shizuoka City Shizuoka Hospital: Tomoya Onodera, Ryuzo Nawada

Hamamatsu Rosai Hospital: Eiji Shinoda, Miho Yamada

Shiga University of Medical Science Hospital: Takashi Yamamoto, Hiroshi Sakai

Japanese Red Cross Wakayama Medical Center: Takashi Tamura, Mamoru Toyofuku

Shimabara Hospital: Mamoru Takahashi

Shizuoka General Hospital: Hiroki Sakamoto, Tomohisa Tada

Kurashiki Central Hospital: Kazushige Kadota, Takeshi Tada

Mitsubishi Kyoto Hospital: Shinji Miki, Kazuhisa Kaneda

Shimada Municipal Hospital: Takeshi Aoyama

Juntendo University Shizuoka Hospital: Satoru Suwa

**Cardiovascular Surgery**

Kyoto University Hospital: Kenji Minatoya, Kazuhiro Yamazaki

Kishiwada City Hospital: Tatsuya Ogawa

Tenri Hospital: Atsushi Iwakura

Hyogo Prefectural Amagasaki General Medical Center: Nobuhisa Ohno

Kitano Hospital: Michiya Hanyu

Kokura Memorial Hospital: Yoshiharu Soga, Akira Marui

Kindai University Nara Hospital: Nobushige Tamura

Kobe City Medical Center General Hospital: Tadaaki Koyama

Osaka Red Cross Hospital: Shogo Nakayama

Shizuoka City Shizuoka Hospital: Fumio Yamazaki, Yasuhiko Terai

Hamamatsu Rosai Hospital: Junichiro Nishizawa

Japanese Red Cross Wakayama Medical Center: Naoki Kanemitsu, Hiroyuki Hara

Shizuoka General Hospital: Hiroshi Tsuneyoshi

Kurashiki Central Hospital: Tatsuhiko Komiya

Mitsubishi Kyoto Hospital: Jiro Esaki

Juntendo University Shizuoka Hospital: Keiichi Tambara

**Supplemental Appendix B: List of clinical research coordinators****The CREDO-Kyoto PCI/CABG Registry Cohort-2**

Research Institute for Production Development

Kumiko Kitagawa, Misato Yamauchi, Naoko Okamoto, Yumika Fujino, Saori Tezuka, Asuka

Saeki, Miya Hanazawa, Yuki Sato, Chikako Hibi, Hitomi Sasae, Emi Takinami, Yuriko

Uchida, Yuko Yamamoto, Satoko Nishida, Mai Yoshimoto, Sachiko Maeda, Izumi Miki,

Saeko Minematsu

**The CREDO-Kyoto PCI/CABG Registry Cohort-3**

Research Institute for Production Development

Sakiko Arimura, Yumika Fujino, Miya Hanazawa, Chikako Hibi, Risa Kato, Yui Kinoshita,

Kumiko Kitagawa, Masayo Kitamura, Takahiro Kuwahara, Satoko Nishida, Naoko Okamoto,

Yuki Sato, Saori Tezuka, Marina Tsuda, Miyuki Tsumori, Misato Yamauchi, Itsuki

Yamazaki

### Supplemental Appendix C: Definitions of baseline characteristics and endpoints

Diabetes was defined as treatment with oral hypoglycemic agents or insulin, prior clinical diagnosis of diabetes, glycated hemoglobin level  $\geq 6.5\%$ , or non-fasting blood glucose level  $\geq 200$  mg/dL. Left ventricular ejection fraction was measured either by contrast left ventriculography or echocardiography. Prior stroke was defined as ischemic or hemorrhagic stroke with neurological symptoms lasting  $>24$  hours. Peripheral vascular disease was regarded as present when carotid, aortic, or other peripheral vascular diseases were being treated or scheduled for surgical or endovascular interventions. Renal function was expressed as estimated glomerular filtration rate (eGFR) calculated by the Modification of Diet in Renal Disease formula modified for Japanese patients.<sup>1</sup> High-intensity statins therapy in this study was defined as the statin doses greater than or equal to atorvastatin 20 mg, pitavastatin 4 mg, or rosuvastatin 10 mg.

Death was regarded as cardiac in origin unless obvious non-cardiac causes could be identified. Cardiovascular death included cardiac death, and other vascular death related to stroke, renal disease, and vascular disease. Any death during the index hospitalization and death of unknown cause were regarded as cardiac death. Sudden death was defined as unexplained death in previously stable patients. Myocardial infarction was defined according to the definition in the Arterial Revascularization Therapy Study (ARTS)<sup>2</sup>, and only Q-wave myocardial infarction was regarded as myocardial infarction when it occurred within 7 days of the index procedure.<sup>3</sup> Definite stent thrombosis was defined according to the Academic Research Consortium (ARC) definition.<sup>4</sup> Stroke during follow up was defined as ischemic or hemorrhagic stroke requiring hospitalization with symptoms lasting  $>24$  hours. Hospitalization for heart failure was defined as hospitalization due to worsening heart failure requiring intravenous drug therapy. Major bleeding was defined as the global utilization of streptokinase and tissue plasminogen activator for occluded coronary arteries (GUSTO)



moderate/severe bleeding.<sup>3, 5</sup> TVR was defined as either PCI or CABG related to the original target vessel. Any coronary revascularization was defined as either PCI or CABG for any reason. Scheduled staged coronary revascularization procedures performed within 3 months of the initial procedure were not regarded as follow-up events, but included in the index procedure. Duration of dual antiplatelet therapy (DAPT) in patients who underwent PCI was left to the discretion of each attending physician. Persistent discontinuation of DAPT was defined as withdrawal of either thienopyridines or aspirin for at least 2 months.

**Supplemental Appendix D: List of the clinical event committee members****The CREDO-Kyoto PCI/CABG Registry Cohort-2**

Mitsuru Abe (Kyoto Medical Center), Hiroki Shiomi (Kyoto University Hospital), Tomohisa Tada (Deutsches Herzzentrum), Junichi Tazaki (Kyoto University Hospital), Yoshihiro Kato (Saiseikai Noe Hospital), Mamoru Hayano (Gunma Cardiovascular Center), Akihiro Tokushige (Kagoshima University Hospital), Masahiro Natsuaki (Kyoto University Hospital), Tetsu Nakajima (Kyoto University Hospital).

**The CREDO-Kyoto PCI/CABG Registry Cohort-3**

Masayuki Fuki (Kyoto University Hospital), Eri Toda Kato (Kyoto University Hospital), Yukiko Matsumura-Nakano (Kyoto University Hospital), Kenji Nakatsuma (Mitsubishi Kyoto Hospital), Hiroki Shiomi (Kyoto University Hospital), Yasuaki Takeji (Kyoto University Hospital), Hidenori Yaku (Mitsubishi Kyoto Hospital), Erika Yamamoto (Kyoto University Hospital), Ko Yamamoto (Kyoto University Hospital), Yugo Yamashita (Kyoto University Hospital), Yusuke Yoshikawa (Kyoto University Hospital), Hiroki Watanabe (Japanese Red Cross Wakayama Medical Center)

**Supplemental Appendix E: Missing values about baseline characteristics**

There were missing values for body mass index in 125 patients (Cohort-2: 103 [6.1%] and Cohort-3: 22 [2.1%]), for systolic blood pressure in 28 patients (Cohort-2: 22 [1.3%] and Cohort-3: 6 [0.4%]), for diastolic blood pressure in 31 patients (Cohort-2: 22 [1.3%] and Cohort-3: 9 [0.6%]), for LVEF in 813 patients (Cohort-2: 558 [33%] and Cohort-3: 255 [16%]), for eGFR in 31 patients (Cohort-2: 29 [1.7%] and Cohort-3: 2 [0.1%]), for hemoglobin level in 35 patients (Cohort-2: 33 [2.0%] and Cohort-3: 2 [0.1%]), for platelet count in 17 patients (Cohort-2: 16 [1.0%] and Cohort-3: 1 [0.6%]).

## **Supplementary figure legends**

### **Supplemental Figure 1. Landmark analysis within and beyond 30 days for all-cause death comparing between Cohort-2 and Cohort-3**

HR=hazard ratio; CI=confidence interval.

### **Supplemental Figure 2. Landmark analysis within and beyond 30 days for major bleeding comparing between Cohort-2 and Cohort-3**

Major bleeding was defined as GUSTO moderate/severe bleeding.

HR=hazard ratio; CI=confidence interval; GUSTO=global utilization of streptokinase and tissue plasminogen activator for occluded coronary arteries.

### **Supplemental Figure 3. Kaplan-Meier curves for major bleeding comparing between Cohort-2 and Cohort-3 in patients who received PCI as the index coronary revascularization procedure**

**(A) Entire follow-up period and (B) Landmark analysis within and beyond 30 days**

### **Supplemental Figure 4. Kaplan-Meier curves for persistent DAPT discontinuation comparing between Cohort-2 and Cohort-3 in patients who received PCI as the index coronary revascularization procedure**

Persistent discontinuation of DAPT was defined as withdrawal of either thienopyridines or aspirin for at least 2 months.

DAPT=dual antiplatelet therapy.

1

Supplemental Figure 1. Landmark analysis within and beyond 30 days for all-cause

2

death comparing between Cohort-2 and Cohort-3

3

All-cause death within and beyond 30 days

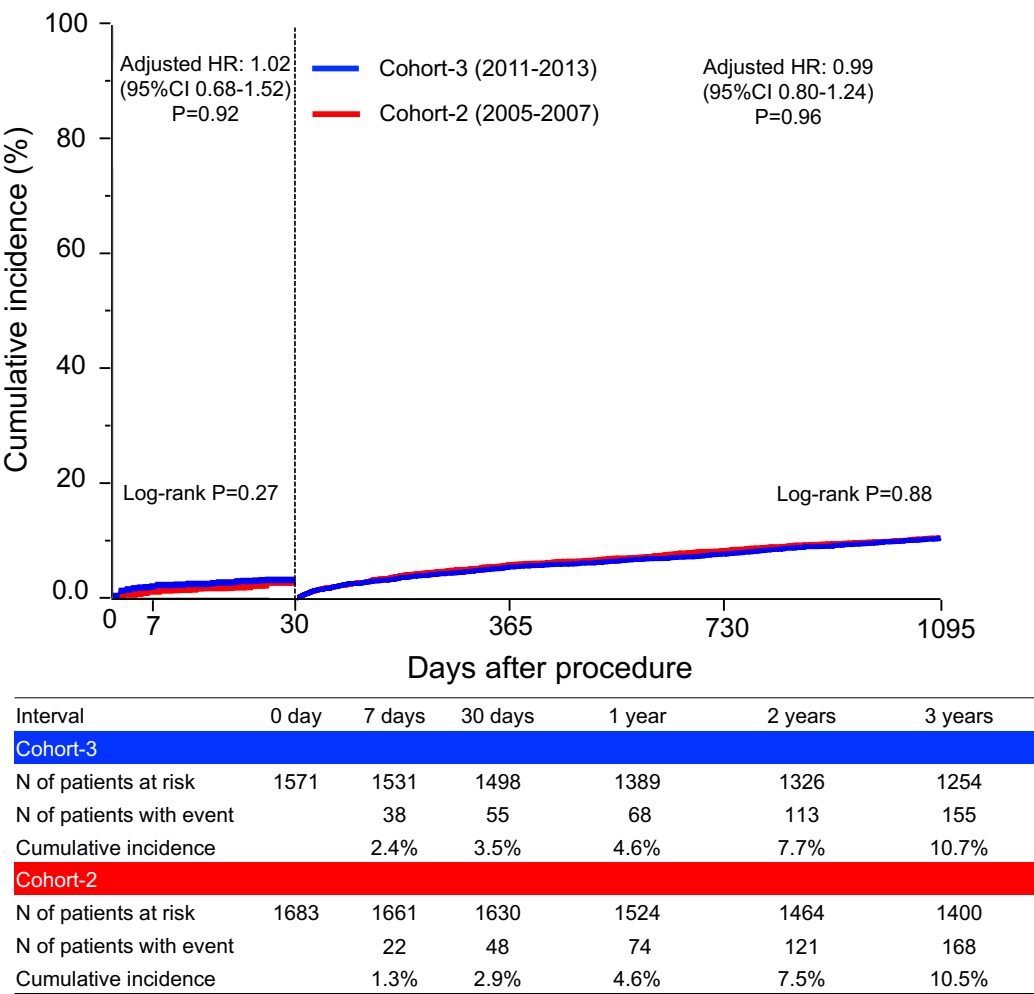

4

5

6

7

8

1

Supplemental Figure 2. Landmark analysis within and beyond 30 days for major

2

bleeding comparing between Cohort-2 and Cohort-3

3

Major bleeding within and beyond 30 days

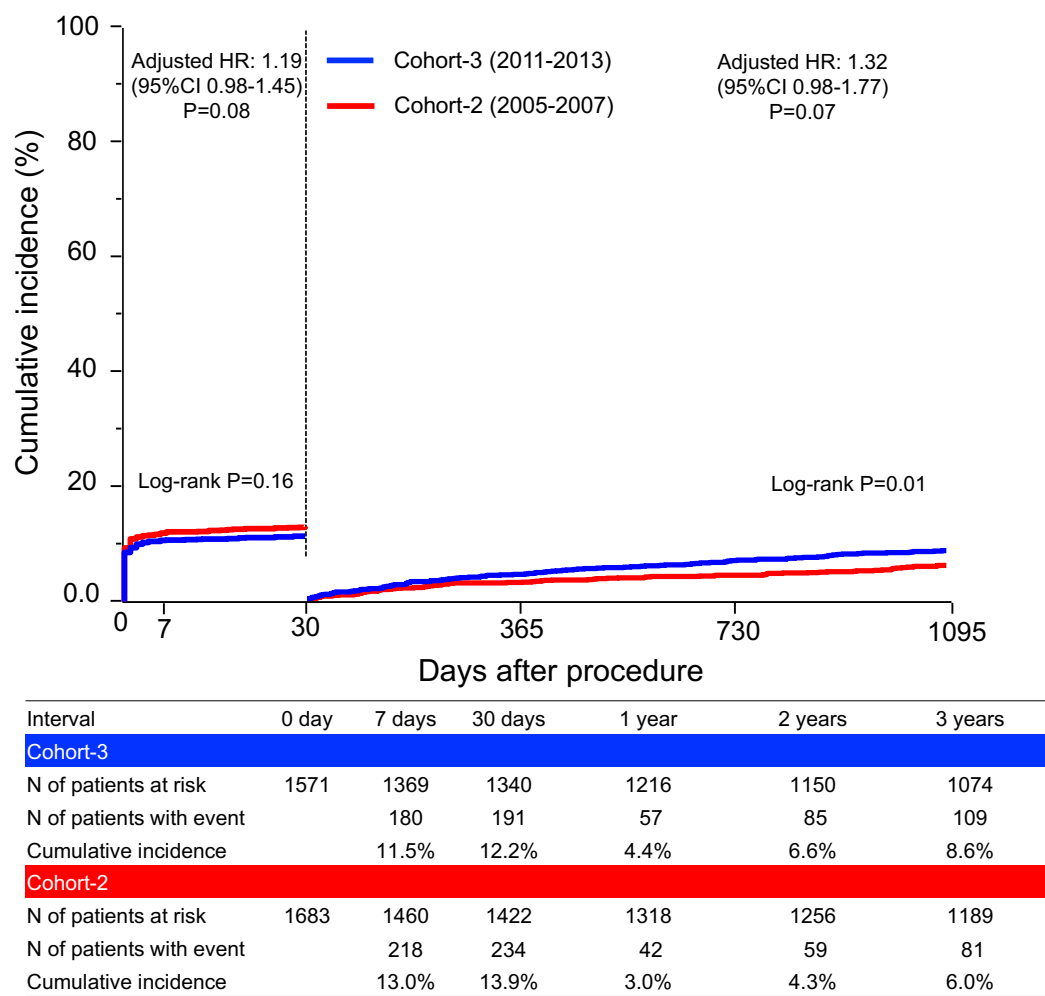

1 Supplemental Figure 3. Kaplan-Meier curves for major bleeding comparing between Cohort-2 and Cohort-3 in patients who received

2 PCI as the index coronary revascularization procedure

3

(A) Entire follow-up period

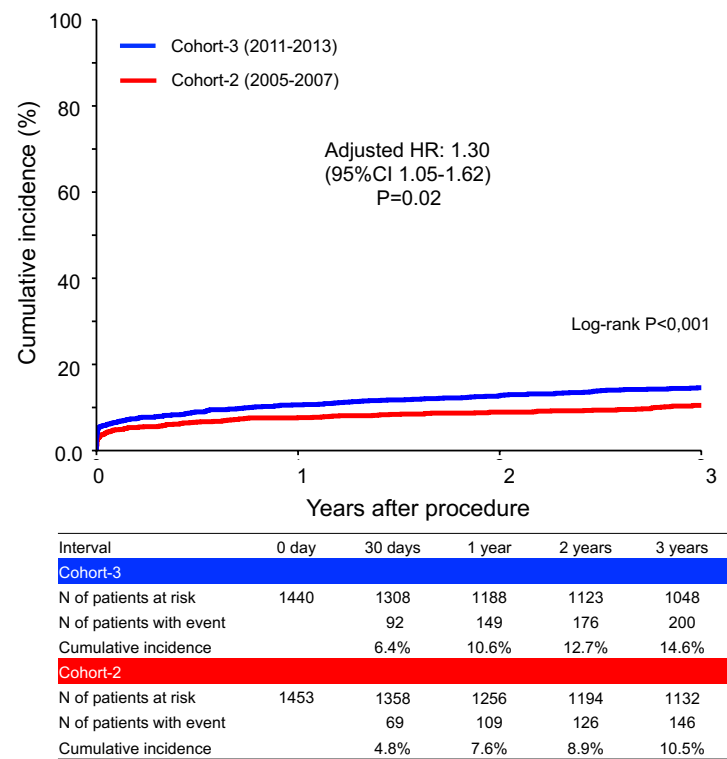

(B) Landmark analysis within and beyond 30 days

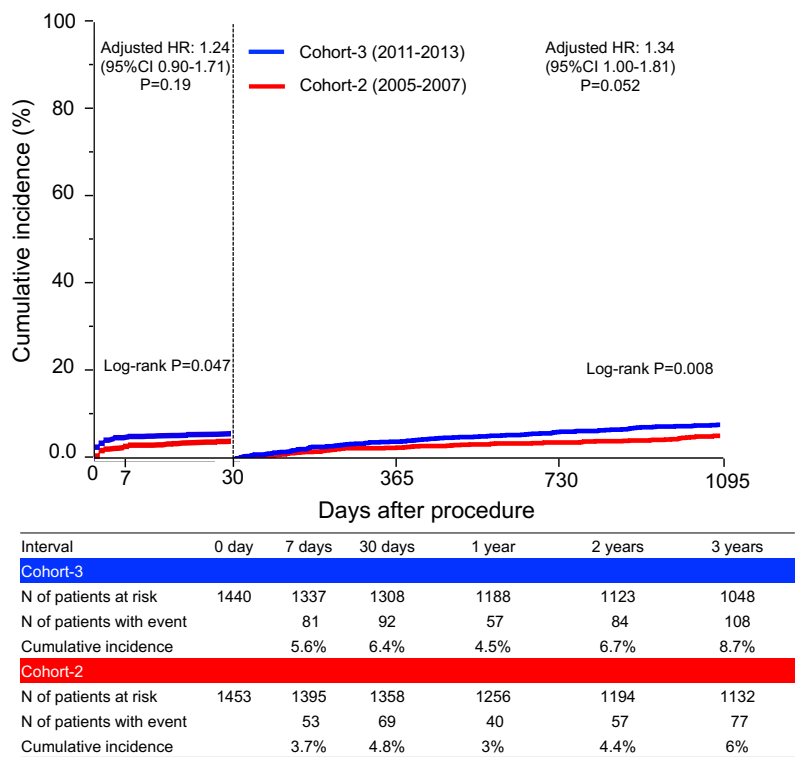

1    **Supplemental Figure 4. Kaplan-Meier curves for persistent DAPT discontinuation**  
2    **comparing between Cohort-2 and Cohort-3 in patients who received PCI as the index**  
3    **coronary revascularization procedure**

4    **Persistent DAPT discontinuation**

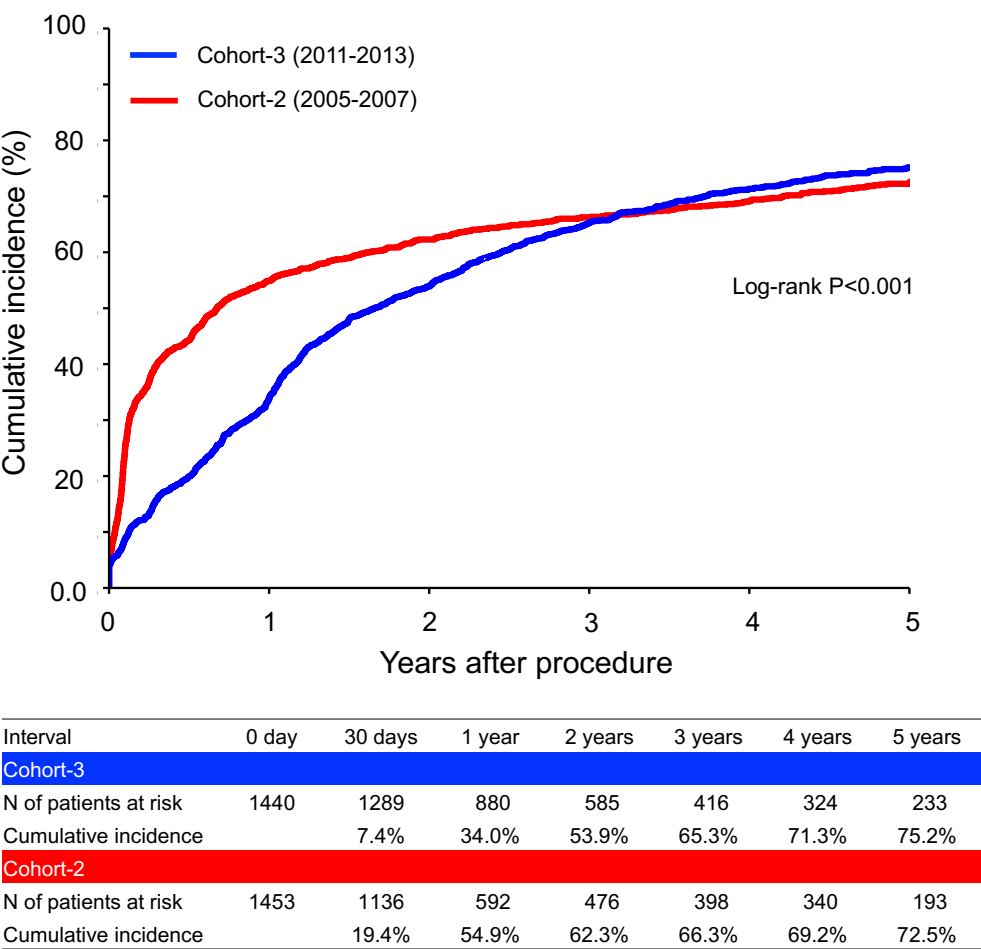



**1 Supplemental Table 1. The annual volume of first coronary revascularization**

**2 procedures for stable coronary artery disease and acute coronary syndrome in each**

**3 participating center in the Cohort-2 and Cohort-3**

| <Cohort-2>                                          | 2005 |      | 2006 |      | 2007 |      |
|-----------------------------------------------------|------|------|------|------|------|------|
|                                                     | PCI  | CABG | PCI  | CABG | PCI  | CABG |
| Kansai Denryoku Hospital                            | 38   | 0    | 62   | 0    | 51   | 0    |
| Kishiwada City Hospital                             | 104  | 14   | 115  | 16   | 136  | 10   |
| Kyoto University Hospital                           | 163  | 18   | 201  | 6    | 158  | 1    |
| Nara Hospital, Kinki University Faculty of Medicine | 115  | 102  | 99   | 87   | 77   | 78   |
| Kumamoto University Hospital                        | 60   | 26   | 55   | 26   | 83   | 11   |
| Koto Memorial Hospital                              | 70   | 0    | 140  | 0    | 186  | 0    |
| Mitsubishi Kyoto Hospital                           | 100  | 26   | 105  | 24   | 123  | 31   |
| Shimada Municipal Hospital                          | 46   | 0    | 73   | 0    | 118  | 0    |
| Shiga University of Medical Science Hospital        | 72   | 0    | 84   | 0    | 58   | 0    |
| Kagoshima University Medical and Dental Hospital    | 27   | 64   | 34   | 53   | 33   | 49   |
| Juntendo University Shizuoka Hospital               | 247  | 34   | 254  | 28   | 247  | 21   |
| Kokura Memorial Hospital                            | 709  | 109  | 674  | 123  | 822  | 127  |
| Kobe City Medical Center General Hospital           | 203  | 35   | 217  | 45   | 235  | 43   |
| Nishi-Kobe Medical Center                           | 93   | 0    | 69   | 0    | 95   | 0    |
| Shizuoka General Hospital                           | 175  | 16   | 188  | 21   | 187  | 18   |
| Shizuoka City Shizuoka Hospital                     | 183  | 103  | 173  | 87   | 185  | 92   |
| Kurashiki Central Hospital                          | 663  | 53   | 600  | 34   | 538  | 48   |
| Osaka Red Cross Hospital                            | 147  | 18   | 157  | 24   | 129  | 22   |
| Tenri Hospital                                      | 146  | 29   | 134  | 14   | 245  | 24   |
| Shimabara Hospital                                  | 94   | 12   | 96   | 8    | 126  | 4    |
| Japanese Red Cross Wakayama Medical Center          | 215  | 32   | 233  | 39   | 183  | 25   |
| Hamamatsu Rosai Hospital                            | 97   | 30   | 73   | 38   | 80   | 33   |
| Maizuru Kyosai Hospital                             | 145  | 15   | 136  | 16   | 89   | 7    |
| University of Fukui Hospital                        | 58   | 13   | 68   | 17   | 109  | 7    |
| Hyogo Prefectural Amagasaki Hospital                | 148  | 23   | 184  | 24   | 209  | 20   |
| Kitano Hospital                                     | 80   | 0    | 64   | 0    | 70   | 0    |

| <Cohort-3>                                             | 2011 |      | 2012 |      | 2013 |      |
|--------------------------------------------------------|------|------|------|------|------|------|
|                                                        | PCI  | CABG | PCI  | CABG | PCI  | CABG |
| Kansai Denryoku Hospital                               | 96   | 0    | 63   | 0    | 75   | 0    |
| Kyoto University Hospital                              | 145  | 13   | 138  | 14   | 172  | 5    |
| Nara Hospital, Kinki University<br>Faculty of Medicine | 103  | 81   | 94   | 85   | 79   | 76   |
| Koto Memorial Hospital                                 | 219  | 0    | 187  | 0    | 204  | 0    |
| Mitsubishi Kyoto Hospital                              | 119  | 29   | 114  | 30   | 151  | 31   |
| Kishiwada City Hospital                                | 124  | 18   | 98   | 11   | 112  | 12   |
| Shimada Municipal Hospital                             | 152  | 0    | 147  | 0    | 130  | 0    |
| Shiga University of Medical Science<br>Hospital        | 106  | 0    | 100  | 0    | 113  | 0    |
| Juntendo University Shizuoka Hospital                  | 240  | 13   | 261  | 35   | 258  | 29   |
| Kokura Memorial Hospital                               | 825  | 94   | 767  | 115  | 767  | 97   |
| Kobe City Medical Center General<br>Hospital           | 196  | 26   | 172  | 38   | 194  | 41   |
| Nishi-Kobe Medical Center                              | 84   | 0    | 91   | 0    | 78   | 0    |
| Shizuoka General Hospital                              | 183  | 17   | 137  | 19   | 137  | 21   |
| Shizuoka City Shizuoka Hospital                        | 255  | 66   | 263  | 69   | 286  | 67   |
| Kurashiki Central Hospital                             | 662  | 24   | 601  | 54   | 601  | 47   |
| Osaka Red Cross Hospital                               | 156  | 17   | 157  | 17   | 162  | 18   |
| Tenri Hospital                                         | 201  | 24   | 240  | 30   | 240  | 27   |
| Shimabara Hospital                                     | 79   | 0    | 77   | 0    | 77   | 0    |
| Japanese Red Cross Wakayama<br>Medical Center          | 195  | 27   | 203  | 19   | 173  | 26   |
| Hamamatsu Rosai Hospital                               | 108  | 22   | 110  | 14   | 132  | 15   |
| Hyogo Prefectural Amagasaki<br>Hospital                | 198  | 13   | 182  | 10   | 203  | 8    |
| Kitano Hospital                                        | 82   | 17   | 85   | 12   | 99   | 16   |
| 1                                                      |      |      |      |      |      |      |
| 2                                                      |      |      |      |      |      |      |
| 3                                                      |      |      |      |      |      |      |

1   **Reference:**

- 2   1.       Matsuo S, Imai E, Horio M, et al. Revised equations for estimated GFR from serum  
3   creatinine in Japan. *Am J Kidney Dis*. 2009;53:982-92.
- 4   2.       Serruys PW, Unger F, Sousa JE, et al. Comparison of coronary-artery bypass surgery  
5   and stenting for the treatment of multivessel disease. *N Engl J Med*. 2001;344:1117-24.
- 6   3.       Kimura T, Morimoto T, Furukawa Y, et al. Long-term safety and efficacy of  
7   sirolimus-eluting stents versus bare-metal stents in real world clinical practice in Japan.  
8   *Cardiovasc Interv Ther*. 2011;26:234-45.
- 9   4.       Cutlip DE, Windecker S, Mehran R, et al. Clinical end points in coronary stent trials:  
10   a case for standardized definitions. *Circulation*. 2007;115:2344-51.
- 11   5.       An international randomized trial comparing four thrombolytic strategies for acute  
12   myocardial infarction. *N Engl J Med*. 1993;329:673-82.

13
